# Supplementary material
Source: PubMed Central journal article supplement (PMC3547472)
Supplement: cn300238j_si_001.pdf [file cn300238j_si_001.pdf]

**Table S1. Membrane properties of DR neurons after social defeat**

| <b>vmDR</b>            | <b>RMP (mV)</b> | <b>Input Res (MOhms)</b> | <b>Tau (ms)</b> | <b>AHP Amp (mV)</b> | <b>AHP t 1/2 (ms)</b> | <b>AP Thres (mV)</b> | <b>AP Dur (ms)</b> | <b>AP Amp (mV)</b> | <b># AP at 80pA</b> | <b>Gain (Hz/pA)</b> |
|------------------------|-----------------|--------------------------|-----------------|---------------------|-----------------------|----------------------|--------------------|--------------------|---------------------|---------------------|
| <b>CONTROL (n=18)</b>  | -64.3 ± 0.7     | 467.9 ± 31.1             | 27.2 ± 1.8      | 27.5 ± 1.2          | 154.1 ± 13.0          | -22.1 ± 0.8          | 1.8 ± 0.1          | 56.3 ± 1.5         | 1.5 ± 0.4           | 0.019 ± 0.005       |
| <b>INTRUDER (n=18)</b> | -65.3 ± 2.1     | 441.1 ± 36.1             | 28.2 ± 1.3      | 28.4 ± 0.9          | 172.7 ± 11.5          | -20.3 ± 1.0          | 1.8 ± 0.07         | 56.9 ± 2.0         | 1.3 ± 0.3           | 0.016 ± 0.004       |
| t-test p val           | 0.703           | 0.580                    | 0.647           | 0.545               | 0.294                 | 0.146                | 0.575              | 0.798              | 0.678               | 0.612               |
| <b>lwDR</b>            | <b>RMP (mV)</b> | <b>Input Res (MOhms)</b> | <b>Tau (ms)</b> | <b>AHP Amp (mV)</b> | <b>AHP t 1/2 (ms)</b> | <b>AP Thres (mV)</b> | <b>AP Dur (ms)</b> | <b>AP Amp (mV)</b> | <b># AP at 80pA</b> | <b>Gain (Hz/pA)</b> |
| <b>CONTROL (n=15)</b>  | -63.7 ± 2.1     | 688.8 ± 56.7             | 35.4 ± 2.4      | 34.7 ± 1.6          | 266.5 ± 18.1          | -24.8 ± 0.8          | 2.5 ± 0.1          | 65.7 ± 1.6         | 2.4 ± 0.4           | 0.030 ± 0.005       |
| <b>INTRUDER (n=18)</b> | -65.5 ± 2.3     | 522.1 ± 30.9             | 33.2 ± 3.3      | 32.2 ± 1.5          | 231.1 ± 14.8          | -25.5 ± 0.7          | 2.4 ± 0.1          | 61.0 ± 2.8         | 2.2 ± 0.3           | 0.029 ± 0.004       |
| t-test p val           | 0.592           | 0.139                    | 0.626           | 0.273               | 0.141                 | 0.522                | 0.639              | 0.202              | 0.749               | 0.845               |

Values are mean ± s.e.m. AHP - after hyperpolarization, Amp - amplitude, AP - action potential, Dur - duration, Res - resistance, RMP - resting membrane potential, t ½ - time to half-amplitude, Thresh - threshold

**Table S2. Autoreceptor-mediated responses of DR neurons after social defeat**

| <b>vmDR</b>               | <b>Hyperpol (mV)</b> | <b>Δ Res (Mohms)</b> | <b>% Decr Res</b> | <b>lwDR</b>               | <b>Hyperpol (mV)</b> | <b>Δ Res (Mohms)</b> | <b>% Decr Res</b> |
|---------------------------|----------------------|----------------------|-------------------|---------------------------|----------------------|----------------------|-------------------|
| <b>CONTROL</b><br>(n=18)  | -10.9 ± 2.1          | -270.7 ± 56.6        | -45.3 ± 6.2       | <b>CONTROL</b><br>(n=15)  | -8.5 ± 1.3           | -203.9 ± 38.5        | -49.3 ± 3.7       |
| <b>INTRUDER</b><br>(n=18) | -13.0 ± 2.6          | -321.5 ± 45.6        | -54.7 ± 3.3       | <b>INTRUDER</b><br>(n=18) | -12.0 ± 3.0          | -295.4 ± 94.5        | -50.4 ± 7.5       |
| t-test p val              | 0.566                | 0.526                | 0.255             | t-test p val              | 0.305                | 0.383                | 0.896             |

Values are mean ± s.e.m. Hyperpol - Hyperpolarization, Res - Resistance

**Table S3. Results of sIPSC recordings in DR neurons of untreated mice**

|                       | Frequency<br>(Hz) | Weighted<br>Decay Tau<br>(ms) | Decay Time<br>50%<br>(ms) | Rise Time<br>(ms) | Average<br>Amp (pA) | Median<br>Amp (pA) | Charge Per<br>IPSC (pAms) | Mean Phasic<br>Current (pA) |
|-----------------------|-------------------|-------------------------------|---------------------------|-------------------|---------------------|--------------------|---------------------------|-----------------------------|
| <b>vmDR</b><br>(n=13) | 2.2 ± 0.7         | 5.1 ± 0.3                     | 1.8 ± 0.08                | 1.9 ± 0.06        | 12.6 ± 1.2          | 10.8 ± 0.8         | 74.0 ± 6.2                | 0.18 ± 0.05                 |
| <b>lwDR</b><br>(n=13) | 1.9 ± 0.5         | 5.3 ± 0.7                     | 1.8 ± 0.08                | 1.9 ± 0.07        | 11.7 ± 0.9          | 10.2 ± 0.7         | 69.5 ± 7.2                | 0.11 ± 0.02                 |
| t-test p val          | 0.717             | 0.801                         | 0.879                     | 0.905             | 0.586               | 0.533              | 0.642                     | 0.247                       |

Values are mean ± s.e.m. Amp - amplitude

**Table S4. Results of sEPSC recordings in DR neurons after social defeat**

| <b>vmDR</b>               | <b>Frequency (Hz)</b> | <b>Decay Tau (ms)</b> | <b>Rise Time (ms)</b> | <b>Average Amp (pA)</b> | <b>Median Amp (pA)</b> | <b>Charge Per EPSC (pAms)</b> | <b>Mean Phasic Current (pA)</b> |
|---------------------------|-----------------------|-----------------------|-----------------------|-------------------------|------------------------|-------------------------------|---------------------------------|
| <b>CONTROL</b><br>(n=14)  | 14.7 ± 3.0            | 1.9 ± 0.2             | 1.4 ± 0.03            | 17.1 ± 1.0              | 13.6 ± 0.8             | 47.7 ± 4.2                    | 0.66 ± 0.12                     |
| <b>INTRUDER</b><br>(n=13) | 19.0 ± 3.1            | 1.9 ± 0.2             | 1.4 ± 0.5             | 16.2 ± 1.0              | 12.8 ± 0.5             | 48.5 ± 4.1                    | 0.70 ± 0.18                     |
| t-test p val              | 0.349                 | 0.917                 | 0.602                 | 0.575                   | 0.417                  | 0.906                         | 0.843                           |
| <b>IWDR</b>               | <b>Frequency (Hz)</b> | <b>Decay Tau (ms)</b> | <b>Rise Time (ms)</b> | <b>Average Amp (pA)</b> | <b>Median Amp (pA)</b> | <b>Charge Per EPSC (pAms)</b> | <b>Mean Phasic Current (pA)</b> |
| <b>CONTROL</b><br>(n=16)  | 22.8 ± 3.2            | 1.4 ± 0.1             | 1.3 ± 0.02            | 18.4 ± 0.5              | 14.2 ± 0.5             | 44.0 ± 1.8                    | 0.99 ± 0.14                     |
| <b>INTRUDER</b><br>(n=15) | 22.0 ± 4.0            | 1.7 ± 0.1             | 1.3 ± 0.02            | 17.5 ± 1.0              | 14.3 ± 0.8             | 46.8 ± 3.2                    | 1.07 ± 0.23                     |
| t-test p val              | 0.883                 | 0.080                 | 0.965                 | 0.464                   | 0.945                  | 0.438                         | 0.755                           |

Values are mean ± s.e.m. Amp - amplitude
